# Supplementary material
Source: Research Square preprint supplement (doi:10.21203/rs.3.rs-9053206/v1)
Supplement: Supplementary file 1 [file 770c259c0a4b8577356c0139.pdf]

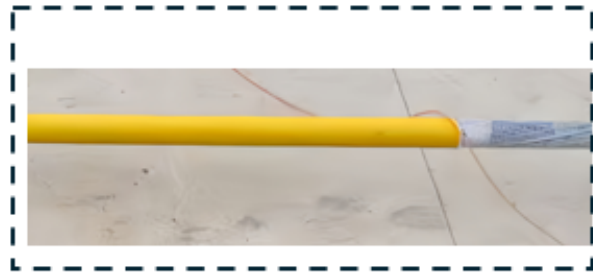

Sample preparation

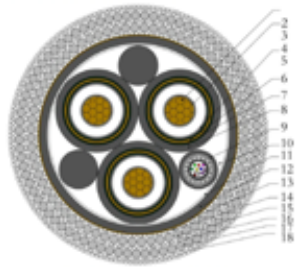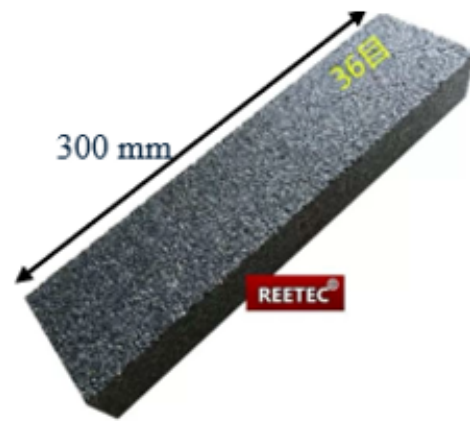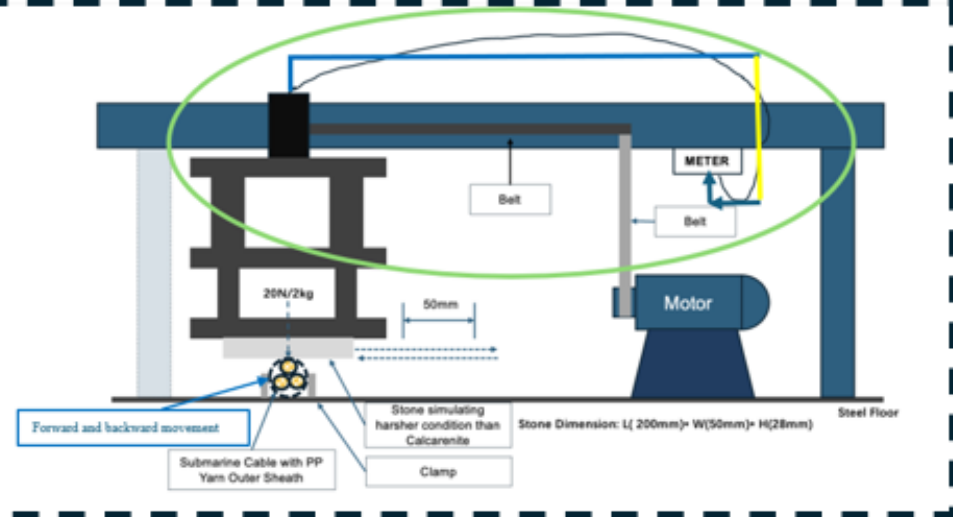

Abrasive device : Test Set-up

Results and discussions

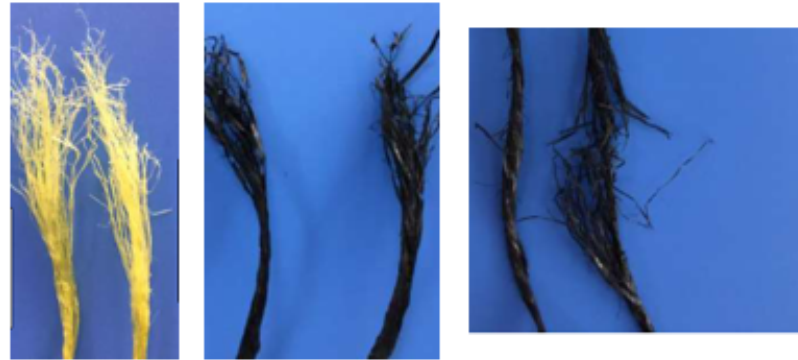

Friction and Pressure : Seabed friction coefficient of 0.35 and 20N

No of cycles: 15 mm longitudinally at 55 cycles per minute under 20 N load with 400 mm/s speed.

Temperature 20° to 30°

Dry operation condition
